# Supplementary material for: Use of Lipid-, Blood Pressure–, and Glucose-Lowering Pharmacotherapy in Patients With Type 2 Diabetes and Atherosclerotic Cardiovascular Disease
Source: PubMed Central journal article supplement — JAMA Netw Open. 2022 Feb 17;5(2):e2148030. doi: 10.1001/jamanetworkopen.2021.48030 (PMC8855234; doi:10.1001/jamanetworkopen.2021.48030), 2022-02-17
Supplement: jamanetwopen-e2148030-s001.pdf [file jamanetwopen-e2148030-s001.pdf]

## Supplemental Online Content

Nelson AJ, O'Brien EC, Kaltenbach LA, et al. Use of lipid-, blood pressure-, and glucose-lowering pharmacotherapy in patients with type 2 diabetes and atherosclerotic cardiovascular disease. *JAMA Netw Open*. 2022;5(2):e2148030. doi:10.1001/jamanetworkopen.2021.48030

**eTable 1.** Datamarts and Respective Health System Participants

**eTable 2.** Code Lists for Comorbidities and Qualifying ASCVD

This supplemental material has been provided by the authors to give readers additional information about their work.

**eTable 1.** Datamarts and Respective Health System Participants

| <b>CDRN</b> | <b>DataMart Partner</b>                                                                         |
|-------------|-------------------------------------------------------------------------------------------------|
| OneFlorida  | Advent Health                                                                                   |
|             | Capital Health Plan                                                                             |
|             | Florida Medicaid                                                                                |
|             | Orlando Health                                                                                  |
|             | Tallahassee Memorial                                                                            |
|             | University of Florida                                                                           |
|             | University of Miami                                                                             |
| REACHnet    | University Medical Center New Orleans                                                           |
|             | Baylor Research Institute                                                                       |
| ADVANCE     | Ochin, Inc.                                                                                     |
| INSIGHT     | New York School of Medicine/NYU Langone                                                         |
|             | Joan and Sanford Weill Medical College of Cornell University/New York and Presbyterian Hospital |
|             | Albert Einstein College of Medicine/Montefiore Medical Center                                   |
|             | Icahn School of Medicine/Mount Sinai Health System                                              |
|             | Trustees of Columbia University in the City of New York/New York and Presbyterian Hospital      |
| STAR        | Mayo                                                                                            |
|             | Duke University Health System                                                                   |
|             | Wake Forest                                                                                     |

**eTable 2.** Code Lists for Comorbidities and Qualifying ASCVD

|                             |            |                                                                             |
|-----------------------------|------------|-----------------------------------------------------------------------------|
| Type 2 diabetes             | DX09; DX10 | 250; E10; E11                                                               |
| Myocardial infarction       | DX09; DX10 | 410; 412; I21.x; I22.x, I25                                                 |
| Coronary artery disease     | DX09; DX10 | 411; 413.x; 414; I20.x; I24.x; 125.x                                        |
| Cerebrovascular disease     | DX09; DX10 | 433.x; 435.x; 436.x; 437.x; I65.x; G45.x; G46.x; H34.x; I65.x; I66.x; I67.x |
| Peripheral arterial disease | DX09; DX10 | 440.x; I70.x; O93.0; 441.x; I71.x; I73.x; I77.x; I79.x                      |
| Stroke                      | DX09       | 433.x; 434.x; 438.x; I63.x; I69.x                                           |
| Atrial fibrillation         | DX09; DX10 | 427.x; I48;                                                                 |
| Diabetic foot               | DX09; DX10 | 250.81; E08.x; E09.x; E11.x; E13.x; Z86.x                                   |
| Diabetic neuropathy         | DX09; DX10 | 249.x; 250.x; E08.x; E09.x; E11.x; E13.x                                    |
| Diabetic ketoacidosis       | DX09; DX10 | 249.x; 250.x; E08.x; E11.x; E13.x                                           |
| Gastroparesis               | DX09; DX10 | 536.3; K31.84                                                               |
| Dyslipidemia                | DX09; DX10 | 272.x; E78.x                                                                |
